# Supplementary material
Source: PubMed Central journal article supplement (PMC1994700)
Supplement: pgen.0030154.sg010.pdf [file pgen.0030154.sg010.pdf]

pdeA1-Gx 1 LAQGMQLHYQIQVR--THTLEISGVEALSRWHPHLGNLPSRFFAVAEELGQIEAIGRWSLEACRQVVKDRDQIHVPT--VAVNSAVHFRNRALPEHAAALKDHN--KPSRLT  
pdeA2-Gx 1 SKGMNLHYQIQVE--TMTGELSGVEALSRWHPHLGNLPSRFFAVAEELGQIEAIGRWSLEACSQVVKDRDQIVRPT--VAVNSAVHFRNRALPEHAAALKHG--LPDRLT  
pdeA3-Gx 1 LAKGMNLHYQIQVR--THTLEISGVEALSRWHPHLGNLPSRFFAVAEELGQIEAIGRWSLEACRQVVKDRDQIHVPT--VAVNSAVHFRNRALPEHAAALKHH--LPDRLT  
YahA-EC 1 LENHEKHWIQVFC--AQITGTGCELVRMHPHTGCGTGFIFLAESGLIVITRQLKQTADIMPVKHILPDNFNGINVSAGCLAAGFEKCLNLYKLG--NDKILV  
BphG-RS 1 EESQHLVYQPIALNPEITERVGEALRMHPHLHCAQPGTGFIFLAESGLIVITRQLKQTADIMPVKHILPDLKNNVSLQIARPDLEKARADLAQVDP--PRHALC  
VteA-VC 1 FLRDHIFNYIQD--FRSGAMVGEALRYEHTHTGMSSAVFLLEQLGHEKLETVESVSALASG---ADLQSVNLSQRNQQS--ICDPLAICERYG--PASKLT  
VCA0785-vc 1 LRNDLLEVFQPKVS--MKTQRNVGAEALRMKHPVLGELSNETLHMAEQGLIFEVGHFVHQALKASDML-AYCPT-FCJAINVSSVQKNSGFEVQRDLALYC--FAHQLE  
YhjH-Se 1 WLQERAYTQPIYQ---TCGRMAYELLTVTHPLN---PSQRLPDRYFLEITVSHRMEVVKQIDLAKADDFIEHGLLSVNDGPTLIALRQPKLRQLERL---WLR  
Gcpe-Se 1 LENDQLHYQPKI---TWRGEVRSLEALVRMQSPERGLTPELFFSYAEELTVPGRWVLEVVRQLAKRDKINLR--VAVNSARQADQFTALQKALYDLN---EYCPD  
Gcpe-Se 1 LERQELHYQPKI---APAGPTVGFLEALRMHPKQGVNDDQFPLAEKGLIVTGSWVLEACRQREHLQYDLWS--VAVNSALQEOPGLVDTTRSIARHS--TRDLDI  
Dds-EC 1 ISNNQKLVYQPIF--AETGELYGIEALRMHPHLHCHP\*PSRFFLAEEIGETENIGRWVLEACRQAEARSONTHIPA--SVMISALHFRSNQ--PNQSDAHAWG--DGHQIT  
YfgF-EC 1 LEHNHFFMAQPIITG---MRGDVYHELELRKGENDELISDQSFLEPVAHEFQLSSSDMMVLEITLQFVAENRAKIPDAHR--AINISVTSVCCARFPVEVSQLEAKYQ--TEAWQLI  
YegE-EC 1 IKENQMHLAHGVASPRIPERANLWISIKLWS--CEGEIIDEQTERRSFDPALSHADRRVHEFFQQAKAVAS---KGISISLPSVAVGLSSATLVNDLEQENSP--PPRLLH

pdeA1-Gx 115 VEITBSVMNDNSRDTEEVQSTIRNICCGISMDDEFTGYSISRLTRIPTEIKIDRSFNDFEYDTNAQAATMAVITGTSRIGTITVTEGVEEQORDILEKLNCDVYGGYEAAPLA  
pdeA2-Gx 115 VEITBSVMNDSSSETEEVHARRLDVGSMDDFGTGYSISRLTRIPTEIKIDRSFNDFEYDTNAQAATMAVITGTSRIGTITVTEGVEEQMRILEELHCDVYGGYEAAPLA  
pdeA3-Gx 115 VEITBSVMNDNSRDTEEVQSTIRNICCGISMDDFGTGYSISRLTRIPTEIKIDRSFNDFEYDTNAQAATMAVITGTSRIGTITVTEGVEEQMRILEELHCDVYGGYEAAPLA  
YahA-EC 115 LETERNPVPTEARAI--DLSHQHNTIFA--DDFTGATYRYLQAFDFKIDKSFQMASVDEISGHVDNIVELARKGSIIVAEGETEQADLIGKGVFIQGYLYSPVPLA  
BphG-RS 119 LEITETSIS--DEAVSEALISRALGVRAIDDEFTGYSIACLRRLPVDVKLDRAFGGHTAAQDHQIFAATVGHADIKVAEGTETLDLALRAAGADFAQGFHAAAPLS  
VteA-VC 110 LEITHEVYNGTPTSLANARIMYGVGISDDEFTGYSIAGQLAQIPFTEIKIDRSFHDLATNYKHQQLTNMCLLAQSLGHCVVEGVENEETWQYRQLGCDVYGGYEAAPLA  
VCA0785-vc 114 LEITSGLVDEPTASDINRHTLGVLSIDDEFTGYSIAGYKIPEDGKIDRSFLEQESSEDQELVRSMLHAKKLNVMVEGTES--TOEQELEQGCDVYGGYEAAPLA  
YhjH-Se 108 FEVEHIRIP---KDSFASCEFGPLWDDFTGGMANFASLSEAYDYKIAELVMLRQSPERGLTFSQLHMMRYCRGVLEGVETPEWRDQNSPAFAAGQMFISRPAP  
Gcpe-Se 113 VEITBSCTENDTLALSVQQSGLGQHLDDFTGYSISQLARIPIDAKLIDAFRDIHKQPLSLSVRAIVAQAALNQTAEGVENAKEDAFITKNGVNERQGFLLAKPMP  
Gcpe-Se 115 LETETTTAVNKPEQSVAILTRITEMGVKASIDDEFTGYSISLYLKRIPACEIKIDRAFHELSEAGDGTVAATVAALAKALNQTVAEGVENEETQQFLTQLGCHTQGFLLGKPRP  
Dds-EC 115 VEITBSMMEHDETEIFKRIQIRDMGVGISVDDFTGYSISLVSIPVTEIKIDKSFDRCLTEKRILALEAITSGQSLNITVAEGVEIKETFEMLRKIHCRVYGGYFISRLP\*

YfgF-EC 112 FEVITBSNATNVKQAITQHTQELGCOTADDEFTGYSIYARLKNMADLITKIDGSEIRNTVSNLSDYQIVASITCHIRMKKTLVAEYVENEETREAVLSLGDVYGGYEAAPLA  
YegE-EC 114 LIPAEALID---HAESVQLRLAGCRVLSQVGRDLQIENSKANMADYLIDGECANQQNLMDEHITIIQGHQRGKTAGVWVPLVMDT--SGIGVDLLEGEVADAAQ

115  
114  
113  
112  
111  
110  
109  
108  
107  
106  
105  
104  
103  
102  
101  
100  
99  
98  
97  
96  
95  
94  
93  
92  
91  
90  
89  
88  
87  
86  
85  
84  
83  
82  
81  
80  
79  
78  
77  
76  
75  
74  
73  
72  
71  
70  
69  
68  
67  
66  
65  
64  
63  
62  
61  
60  
59  
58  
57  
56  
55  
54  
53  
52  
51  
50  
49  
48  
47  
46  
45  
44  
43  
42  
41  
40  
39  
38  
37  
36  
35  
34  
33  
32  
31  
30  
29  
28  
27  
26  
25  
24  
23  
22  
21  
20  
19  
18  
17  
16  
15  
14  
13  
12  
11  
10  
9  
8  
7  
6  
5  
4  
3  
2  
1

Girgis et al., Figure S10.
