# Supplementary material
Source: PubMed Central journal article supplement (PMC1994700)

Lyse cells and isolate genomic DNA from mutants

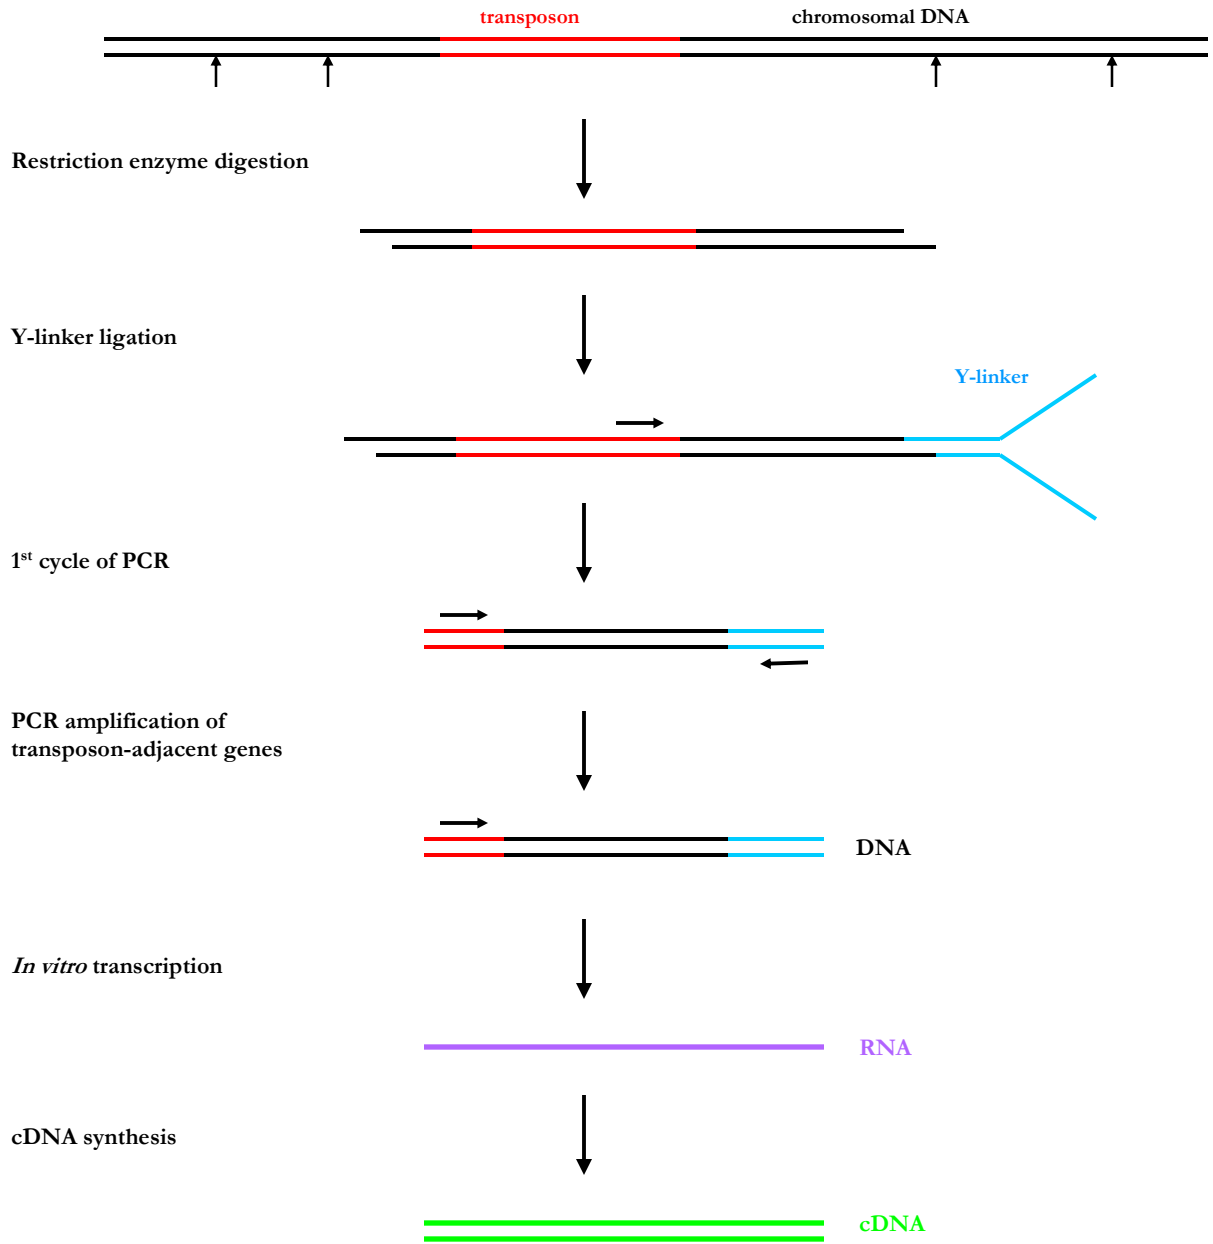

Girgis et al., Figure S1.

Supplement: pgen.0030154.sg001.pdf [file pgen.0030154.sg001.pdf]
